# Supplementary material
Source: publisher site journal article supplement (https://www.kjim.org/upload/media/kjim-2022-069-suppl1.pdf)
Supplement: Supplementary file 1 [file kjim-2022-069-suppl1.pdf]

**Supplementary Table 1. Clinical characteristics of 10 patients with COVID-19-associated pulmonary aspergillosis**

| Age, yr/Sex | Comorbidities     | Severity | APACHE | Baseline Cr | Baseline lymphocyte | Oxygen therapy | Corticosteroid (mean daily dose), mg | Days to CAPA from admission | Consensus criteria | Clinical features                             | Mycologic evidence (OD) | Fungus culture            | Antifungal treatment (dose) | Days to treatment from diagnosis | Duration of anti-fungal agents | Outcome |
|-------------|-------------------|----------|--------|-------------|---------------------|----------------|--------------------------------------|-----------------------------|--------------------|-----------------------------------------------|-------------------------|---------------------------|-----------------------------|----------------------------------|--------------------------------|---------|
| 72/F        | DM                | Critical | 21     | 2.06        | 860.1               | MV             | 125                                  | 7                           | Probable           | Increased patchy consolidation with GGO       | GM (>3.5)               | <i>A. fumigatus</i> on TA | LAB (3 mg/kg)               | 0                                | 3                              | Death   |
| 78/F        | CLD (CHC)         | Critical | 11     | 1.04        | 696.0               | MV             | 99                                   | 12                          | Probable           | Increased pulmonary infiltration              | GM (2.82)               | No growth                 | None                        | NA                               | 0                              | Death   |
| 27/F        | HM, post-HSCT     | Critical | 7      | 0.93        | 951.7               | HFNC           | 405.7                                | 11                          | Probable           | Increased patchy consolidation with GGO       | GM (0.64)               | No growth                 | Voriconazole (200 mg bid)   | 9                                | 40                             | Alive   |
| 87/M        | CKD, COPD, HF, SC | Critical | 13     | 2.89        | 122.0               | MV             | 189.5                                | 9                           | Probable           | Increased patchy consolidation with GGO       | GM (3.20)               | No growth                 | None                        | NA                               | 0                              | Death   |
| 63/M        | CKD, CLD, DM      | Critical | 28     | 3.92        | 686.7               | MV             | 168.0                                | 1                           | Probable           | Multifocal consolidation with GGO             | GM (2.42)               | No growth                 | LAB (3 mg/kg)               | 1                                | 14                             | Death   |
| 77/M        | DM                | Critical | 16     | 0.98        | 524.1               | HFNC           | 103.8                                | 9                           | Probable           | A thin-walled cavitary nodule in LUL          | GM (4.30)               | <i>A. niger</i> on sputum | Voriconazole (200 mg bid)   | 5                                | 38                             | Alive   |
| 64/M        | DM                | Severe   | 14     | 0.87        | 290.3               | NP             | 113.5                                | 17                          | Probable           | Bilateral opacities with consolidation        | GM (1.46)               | No growth                 | Itraconazole (200 mg bid)   | 2                                | NA <sup>a</sup>                | Alive   |
| 75/F        | COPD              | Critical | 11     | 0.56        | 2,595.2             | HFNC           | 34.3                                 | 0                           | Probable           | Increased patchy consolidation with faint GGO | GM (1.64)               | No growth                 | Voriconazole (200 mg bid)   | 2                                | 38                             | Alive   |
| 71/M        | DM                | Critical | 20     | 0.61        | 879.1               | MV             | 85.1                                 | 10                          | Probable           | Increased pulmonary opacities                 | GM (0.99)               | <i>A. fumigatus</i> on TA | Voriconazole (200 mg bid)   | 2                                | NA <sup>a</sup>                | Alive   |
| 71/F        | HM                | Critical | 5      | 0.48        | 259.2               | MV             | 163.8                                | 35                          | Probable           | Bilateral consolidation with GGO              | GM (1.05)               | NA                        | Voriconazole (200 mg bid)   | 1                                | 13                             | Death   |

Corticosteroid doses are presented as methylprednisolone.

COVID-19, coronavirus disease 2019; APACHE, acute physiology and chronic health evaluation; Cr, creatinine; CAPA, COVID-19-associated pulmonary aspergillosis; OD, optical density; DM, diabetes; MV, mechanical ventilation; GGO, ground-glass opacity; GM, galactomannan; TA, tracheal aspirate; LAB, liposomal amphotericin B; CLD, chronic liver disease; CHC, chronic hepatitis C; NA, not available; HM, hematologic malignancy; HSCT, hematopoietic stem cell transplantation; HFNC, high-flow nasal cannula; bid, twice daily; CKD, chronic kidney disease; COPD, chronic obstructive pulmonary disease; HF, heart failure; SC, solid cancer; NP, nasal prong.

<sup>a</sup>It was impossible to trace due to transfer to hospital for recovery after medical condition has improved.
